# Supplementary material for: Chemical tools for the Gid4 subunit of the human E3 ligase C-terminal to LisH (CTLH) degradation complex
Source: Royal Society of Chemistry journal article supplement (doi:10.1039/d3md00633f), 2024-01-01
Supplement: d3md00633f1.pdf [file d3md00633f1.pdf]

**Data Collection and Structure Determination:**

X-ray diffraction data for the GID4 and UBF9092 complex was collected at 100K at beamline NSLS-II Beamline 17-ID-2 of Brookhaven National Laboratory. The data were processed using HKL3000 suite (Otwinowski Z, Minor W. *Meth Enzymol* 1997;276:307–326) and the structure was solved by REFMAC using the PDB entry 6WZZ as a model (Murshudov GN, Vagin AA, Dodson EJ. *Acta Crystallogr D Biol Crystallogr* 1997;53:240–255). REFMAC was also used for structure refinement. Geometry restraints for the compound refinement were prepared by using ACEDRG (Fei Long, Robert A Nicholls, Paul Emsley, Saulius GraZulis, Andrius Merkys, Antanas Vaitkus and Garib N Murshudov. *Acta Cryst.* (2017), D73, 112-122.). Graphics program COOT (Emsley P, Cowtan K. *Acta Crystallogr D Biol Crystallogr* 2004;60:2126–2132) was used for model building and visualization. Molprobit (Williams et al. (2018) MolProbit: More and better reference data for improved all-atom structure validation. *Protein Science* 27: 293-315.) was used for structure validation.

**Supplementary Table 1.** Crystallographic data and refinement statistics

| GID1 + UBF9092a                                         |                                  |
|---------------------------------------------------------|----------------------------------|
| <b>PDB Code</b>                                         | 8V1P                             |
| <b>Data collection</b>                                  |                                  |
| Space group                                             | P4 <sub>1</sub> 2 <sub>1</sub> 2 |
| Cell dimensions                                         |                                  |
| <i>a</i> , <i>b</i> , <i>c</i> (Å)                      | 40.1, 40.1, 201.0                |
| $\alpha$ , $\beta$ , $\gamma$ (°)                       | 90, 90, 90                       |
| Resolution (Å) (highest resolution shell)               | 50.0-2.21 (2.25-2.21)            |
| Unique reflections                                      | 8994                             |
| <i>R</i> <sub>merge</sub>                               | 0.053(0.688)                     |
| <i>I</i> / $\sigma$ <i>I</i>                            | 42.6(2.0)                        |
| Completeness(%)                                         | 99.5(99.5)                       |
| Redundancy                                              | 9.8(5.9)                         |
| CC(1/2)                                                 | 0.998(0.757)                     |
| <b>Refinement</b>                                       |                                  |
| Resolution (Å)                                          | 39.36-2.21                       |
| No. reflections (test set)                              | 8016(895)                        |
| <i>R</i> <sub>work</sub> / <i>R</i> <sub>free</sub> (%) | 21.6/27.8                        |
| No. atoms                                               |                                  |
| Protein                                                 | 1298                             |
| Compound                                                | 23                               |
| B-factors (Å <sup>2</sup> )                             |                                  |
| Protein                                                 | 66.3                             |
| Compound                                                | 59.4                             |
| RMSD                                                    |                                  |
| Bond lengths (Å)                                        | 0.010                            |
| Bond angles (°)                                         | 1.45                             |
| Ramachandran plot % residues                            |                                  |
| Favored                                                 | 94.5                             |
| Additional allowed                                      | 5.5                              |
| Generously allowed                                      | 0                                |
| Disallowed                                              | 0                                |
